# Supplementary material for: BK virus encephalopathy and sclerosing vasculopathy in a patient with hypohidrotic ectodermal dysplasia and immunodeficiency
Source: PubMed Central journal article supplement (PMC4944483; doi:10.1186/s40478-016-0342-3), 2016-07-13
Supplement: 40478_2016_342_MOESM1_ESM.pdf [file 40478_2016_342_MOESM1_ESM.pdf]

## Supplementary Material

### **BK Virus Encephalopathy and Sclerosing Vasculopathy in a Patient with Hypohidrotic Ectodermal Dysplasia and Immunodeficiency**

#### **Acta Neuropathologica**

Armine Darbinyan<sup>1</sup>, Eugene O. Major<sup>2</sup>, Susan Morgello<sup>1,3,4</sup>, Steven Holland<sup>5</sup>, Caroline Ryschkewitsch<sup>2</sup>, Maria Chiara Monaco<sup>2</sup>, Thomas P. Naidich<sup>6</sup>, Joshua Bederson<sup>7</sup>, Joanna Malaczynska<sup>1</sup>, Fei Ye<sup>1</sup>, Ronald Gordon<sup>1</sup>, Charlotte Cunningham-Rundles<sup>8</sup>, Mary Fowkes<sup>1</sup>, Nadejda M. Tsankova<sup>1,4†</sup>

<sup>1</sup>Department of Pathology, Icahn School of Medicine at Mount Sinai, New York, NY 10029

<sup>2</sup>Laboratory of Molecular Medicine and Neuroscience, National Institute of Neurological Disorders and Stroke, National Institutes of Health, Bethesda, Maryland 20892

<sup>3</sup>Department of Neurology, Icahn School of Medicine at Mount Sinai, New York, NY 10029

<sup>4</sup>Department of Neuroscience and Friedman Brain Institute, Icahn School of Medicine at Mount Sinai, New York, NY 10029

<sup>5</sup>Laboratory of Clinical Infectious Diseases, National Institute of Allergy and Infectious Diseases, National Institutes of Health, Bethesda, MD 20892

<sup>6</sup>Department of Radiology, Icahn School of Medicine at Mount Sinai, New York, NY 10029

<sup>7</sup>Department of Neurosurgery, Icahn School of Medicine at Mount Sinai, New York, NY 10029

<sup>8</sup>Department of Medicine - Allergy & Immunology, Icahn School of Medicine at Mount Sinai, New York, NY 10029

† Corresponding Author

nadejda.tsankova@mssm.edu

## Supplemental Figure S1 (Relates to Fig 4)

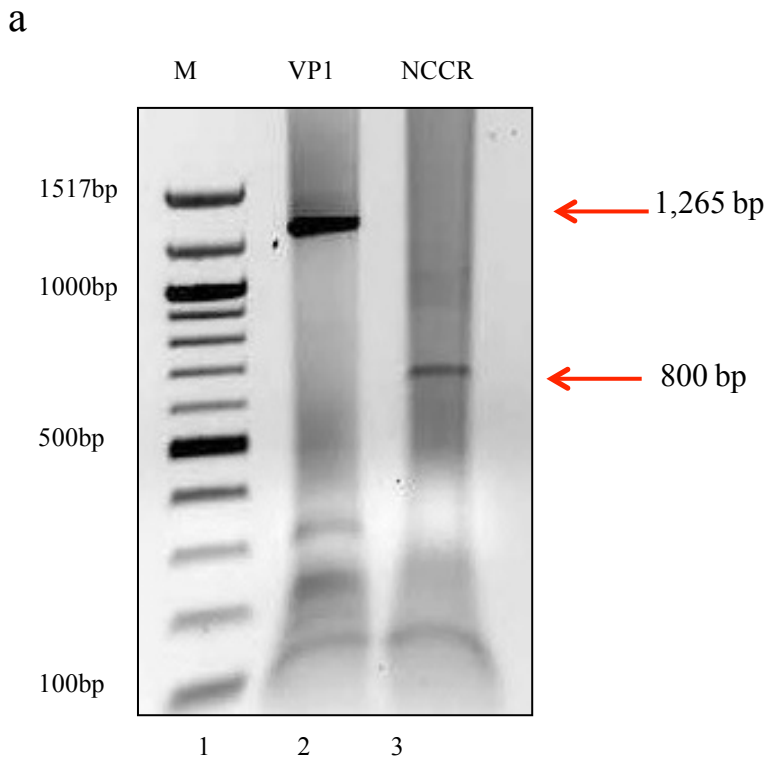

VP1 = 1,265 bp (Primers F: 1456-1475, R: 2725-2744)

NCCR = 800 bp (Primers F: 4881-4902, R: 567-588)

M - marker

Numerical positions of nucleotides in primers based on Dunlop strain, V01108

**b**

### Sequencing results

#### 1. VP1 region of BKV (2583-2154 nt)

5' –  
 AGGTCGTAGATAAAAAGCAGCATTATTAAGTCATGT  
 TTATTATACAATAAAAAGCACCTTGTTTAAACCATTTT  
 TGTTTGCAATTGTCCCTGTCTGTCAATATATCTTATC  
 ATATCTGGGTCCCCTGGAAGCTGTTCTGTGCCATCAA  
 ACACCCTGACCTCCTCCATCTGATACTCCTGACCATA  
 CATAGGGTCCCATCCACTCTCTGGTTCTCCTGTTT  
 ATAAGTCACTAAGCAAAAAGGAAATTGGGTAAGG  
 GTTCTTTACTTGATTTTTTCTCAGGCGAATCTTAAAA  
 TATCTTGGAAGGCCCTCCACTGTTGTGTTCCAGAGC  
 TGTTAGTAAACAGTCCACAAATATCAGCAGCTGAAA  
 CATA CAGGCTATCACTTTACACAGAGGCCCCACCC  
 TGTTCA TCCAGCAACTGTGGTAGCTGTGTTGGTTA  
 C -3'

#### 2. Initial portion of early coding region and NCCR (red) of BKV

5' –  
 TGGCACCTTTATACCTGCTCATTTTTTTATATAAAGT  
 ATTCATTCTCTTTTATCCTCGTCGCCCTTTGTC  
 AGGGTGAAATTCCTTACACTTTCTTAAATAGGCTTT  
 CCTCATTAAGGGAAGGTTTCCCCAGGCAGCTCTTC  
 AAGGCCTAAAAGGTCCATGAGCTCCATGGATTCCCTC  
 CCTGTTTAGCACTTTATCCATTTTTGCAAAAAATTGC  
 AAAAGAATAGGGATTTCCCAAATAGTTTTGCTAGG  
 CCTCAGAAAAAGCCTCCACACCCTTACTACTTGAGA  
 GAAAGGGTGGAGGCAGAGGCGGCCCTCGGCCTCTTA  
 TATATTATAAAAAAAAAAGGCCACAGGGAGGAGCTG  
 CTTTCCCATGGAATGCAGCCAAAGAGGAGCTGCTTT  
 CCCATGGAATGCAAATTTCTCAAATAAACAAAAAT  
 AAAAAAAAAAGGCCACAGGAAGGAGCTGCTTTCCCA  
 TGGAATGCACCCAAAGAGGAGCTGCTTTCCCATGG  
 AATGCAGCCCAACTATGCCCCCGGCATGACTGGGC  
 ACCAAGCCCTGGCTGTTAATATTGAATCCCCGCC  
 CGCAAATTAACAATAACCCCAATACGAAGTGAAA  
 GTTGCCCTTGCCCCACTTAGTATC – 3'

**Fig S1** Targeted sequencing strategy for BKV VP1 and NCCR regions

**a.** Products of nested PCR encompassing 1265bp of BKV VP1 and 800 bp of NCCR with initial portion of early coding region are purified from an 1% agarose gel and submitted to Sanger sequencing. **b.** Sanger sequencing results of VP1 and NCCR purified gel products
